# Supplementary material for: Prevalence of Vitamin D Deficiency in Treatment-Naïve Subjects with Chronic Pulmonary Aspergillosis
Source: MDPI journal article supplement (doi:10.3390/jof6040202), 2020-10-01
Supplement: s1 [file s1]

# Supplementary Materials: Prevalence of Vitamin D Deficiency in Treatment-Naïve Subjects with Chronic Pulmonary Aspergillosis

**Table S1.** Diagnostic criteria for diagnosis of chronic pulmonary aspergillosis.

| <b>Presence of an Underlying Structural Lung Disease</b>                                                                                                                                                                                                                                                                                                                                                                                                                                                                                                                                                                                                                                                       |  |
|----------------------------------------------------------------------------------------------------------------------------------------------------------------------------------------------------------------------------------------------------------------------------------------------------------------------------------------------------------------------------------------------------------------------------------------------------------------------------------------------------------------------------------------------------------------------------------------------------------------------------------------------------------------------------------------------------------------|--|
| <ul style="list-style-type: none"> <li>Post-pulmonary tuberculosis sequelae, interstitial lung disease, allergic bronchopulmonary aspergillosis, chronic obstructive pulmonary disease, bronchiectasis, post-thoracic surgery (lobectomy, pneumonectomy and others), and others</li> </ul>                                                                                                                                                                                                                                                                                                                                                                                                                     |  |
| <b>Clinical Presentation</b>                                                                                                                                                                                                                                                                                                                                                                                                                                                                                                                                                                                                                                                                                   |  |
| <ul style="list-style-type: none"> <li>Duration of symptoms (at least 3 months)</li> <li>Symptoms: systemic (fever, weight loss, anorexia, malaise, fatigue), respiratory (cough, expectoration, dyspnea, chest pain, hemoptysis)</li> </ul>                                                                                                                                                                                                                                                                                                                                                                                                                                                                   |  |
| <b>Evidence of <i>Aspergillus</i> Infection</b>                                                                                                                                                                                                                                                                                                                                                                                                                                                                                                                                                                                                                                                                |  |
| <ul style="list-style-type: none"> <li>Respiratory tract cultures showing <i>Aspergillus</i> species on more than one occasion <ul style="list-style-type: none"> <li><i>A. fumigatus</i>-specific IgG &gt;27 mgA/L (using the ImmunoCap method)*</li> <li>Demonstration of <i>Aspergillus</i> in respiratory secretions by molecular methods</li> <li>Elevated serum (&gt;0.6) or bronchoalveolar lavage fluid (&gt;1.6) galactomannan*</li> </ul> </li> </ul>                                                                                                                                                                                                                                                |  |
| <b>Radiological Manifestations</b>                                                                                                                                                                                                                                                                                                                                                                                                                                                                                                                                                                                                                                                                             |  |
| <ul style="list-style-type: none"> <li>One or more cavities, pulmonary fibrosis, fungal ball, pleural thickening, and nodules</li> <li>Simple aspergilloma: single thin walled cavity with a fungal ball without any pleural thickening or infiltrates surrounding the cavity</li> <li>Chronic cavitory pulmonary aspergillosis (CCPA): presence of one or more cavities with or without fungal ball. Most patients have thick walled cavities with pericavitory infiltrates including nodules, consolidation and parenchymal fibrosis</li> <li>Chronic fibrosing pulmonary aspergillosis: destruction of at least two lobes of lung due to fibrosis. Destruction of one lobe is classified as CCPA</li> </ul> |  |
| <b>Exclusion of other Causes</b>                                                                                                                                                                                                                                                                                                                                                                                                                                                                                                                                                                                                                                                                               |  |
| <ul style="list-style-type: none"> <li>Exclusion of pulmonary disorders with similar presentation such as tuberculous and non-tuberculous mycobacterial infection, chronic necrotizing pneumonias, pulmonary malignancies, and others</li> </ul>                                                                                                                                                                                                                                                                                                                                                                                                                                                               |  |

\* The cut-off value may be different in different geographical locale, method used for estimation, and the study population and needs to be derived.
